# Supplementary material for: NAD+ regulates Treg cell fate and promotes allograft survival via a systemic IL-10 production that is CD4+ CD25+ Foxp3+ T cells independent
Source: PubMed Central journal article supplement (PMC4772111; doi:10.1038/srep22325), 2016-03-01
Supplement: srep22325-s1.pdf [file srep22325-s1.pdf]

## SUPPLEMENTAL MATERIALS

### **NAD<sup>+</sup> regulates Treg cell fate and promotes allograft survival via a systemic IL-10 production that is CD4<sup>+</sup>CD25<sup>+</sup>Foxp3<sup>+</sup> T cells independent**

Abdallah Elkhail<sup>1,†,†</sup>, Hector Rodriguez Cetina Biefer<sup>1,2,†</sup>, Timm Heinbokel<sup>1,3</sup>, Hirofumi Uehara<sup>1</sup>, Markus Quante<sup>1</sup>, Midas Seyda<sup>1</sup>, Jeroen M. Schuitenmaker<sup>1</sup>, Felix Krenzien<sup>1</sup>, Virginia Camacho<sup>4</sup>, Miguel A. de la Fuente<sup>5</sup>, Ionita Ghiran<sup>6</sup> and Stefan G. Tullius<sup>1,\*</sup>

<sup>1</sup>Division of Transplant Surgery and Transplantation Surgery Research Laboratory, Brigham and Women's Hospital, Harvard Medical School, Boston-02115, MA; <sup>2</sup>Clinic for Cardiovascular Surgery, University Hospital Zurich, Zurich-8006, Switzerland; <sup>3</sup>Institute of Medical Immunology, Charité – Universitätsmedizin Berlin, Berlin-10117, Germany; <sup>4</sup>Flow Cytometry Core Facility, Beth Israel Deaconess Medical Center, Harvard Stem Cell Institute, Boston, Massachusetts 02115, USA. <sup>5</sup>Instituto de Biología y Genética Molecular, University of Valladolid, Valladolid-47003, Spain; <sup>6</sup>Department of Medicine, Beth Israel Deaconess Medical Center, Harvard Medical School, Boston, Ma. 02115, USA

†A.E. and H.R.C.B. contributed equally to this work and are co-first authors.

\*Correspondence and requests for materials should be addressed to:

Abdallah Elkhail, Ph. D.  
Transplant Surgery Research Laboratory  
Brigham and Women's Hospital  
221 Longwood Avenue  
Boston, MA 02115, USA  
Email: [aekhal@partners.org](mailto:aekhal@partners.org)  
Phone: 001-617-732-5659

Stefan G. Tullius, MD, PhD  
Division of Transplant Surgery  
Brigham and Women's Hospital  
75 Francis Street  
Boston, Ma. 02115, USA  
Email: [stullius@partners.org](mailto:stullius@partners.org)  
Phone: 001-732 6446

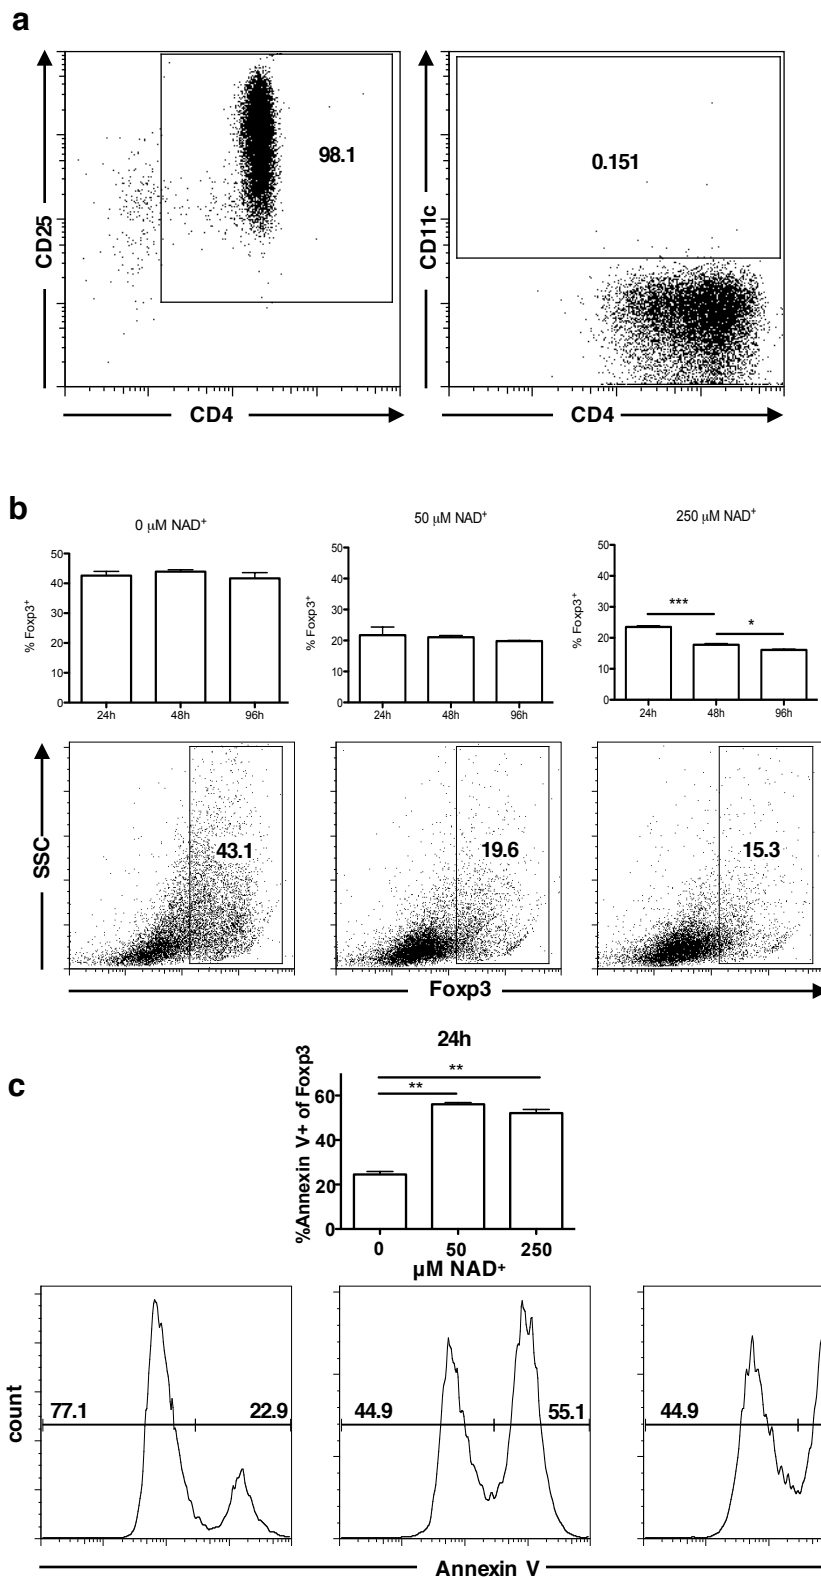

**Supplementary Figure S1: NAD<sup>+</sup> induces Treg apoptosis and loss of Foxp3 expression in vitro.** (a) Purities of CD4<sup>+</sup>CD25<sup>+</sup> Tregs after isolation from spleens of DBA mice were >98%, containing no contaminating CD11c<sup>+</sup> cells (plots shown are representative for three independent experiments). (b) Frequencies of Tregs that were cultured in presence of  $\alpha$ -CD3,  $\alpha$ -CD28, and IL-2 and increasing concentrations of NAD<sup>+</sup> after 24hrs, 48hrs and 96hrs ( $n=6$  per group, representative plots shown). (c) Percentages of Annexin V<sup>+</sup> cells among CD4<sup>+</sup>CD25<sup>+</sup>Foxp3<sup>+</sup> Tregs after 24hrs of culture in presence of  $\alpha$ -CD3,  $\alpha$ -CD28, and IL-2 and increasing concentrations of NAD<sup>+</sup> ( $n=6$  per group, representative plots shown). \*,  $P < 0.05$ ; \*\*,  $P < 0.01$ ; \*\*\*,  $P < 0.001$ . Student's  $t$ -test was used to compare between groups.

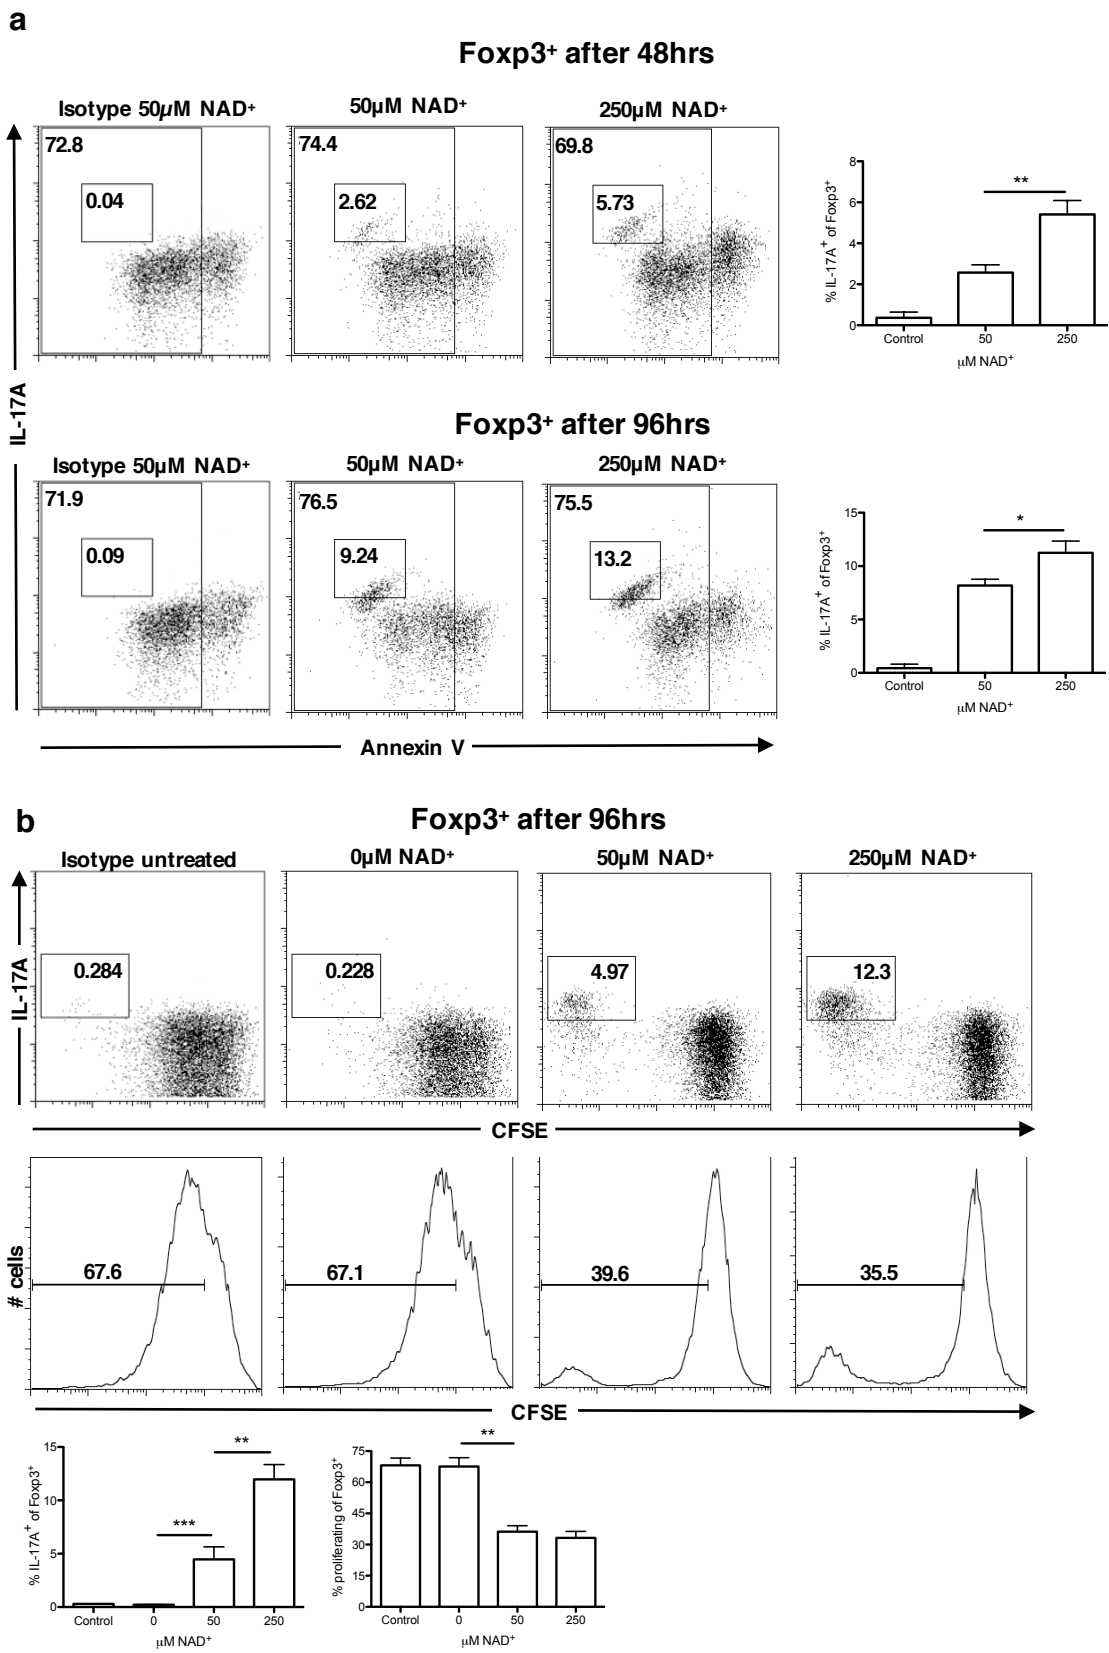

**Supplementary Figure S2: Tregs converted into IL-17A producing cells remain resistant to apoptosis and proliferate in presence of NAD<sup>+</sup> without exogenous IL-23 cytokine.** CD4<sup>+</sup>CD25<sup>+</sup>Foxp3<sup>+</sup> cells were cultured in presence of α-CD3, α-CD28, and IL-2 with increasing concentrations of NAD<sup>+</sup> and (a) apoptosis of CD4<sup>+</sup>CD25<sup>+</sup>Foxp3<sup>+</sup>IL-17A<sup>+</sup> cells was assessed with Annexin V after 48hrs and 96hrs in a dose-dependent manner ( $n=6$  per group; data derived from two independent experiments; representative plots shown). (b) Proliferation was assessed with CFSE in a dose-dependent manner ( $n=6$  per group; data derived from two independent experiments; representative plots shown).

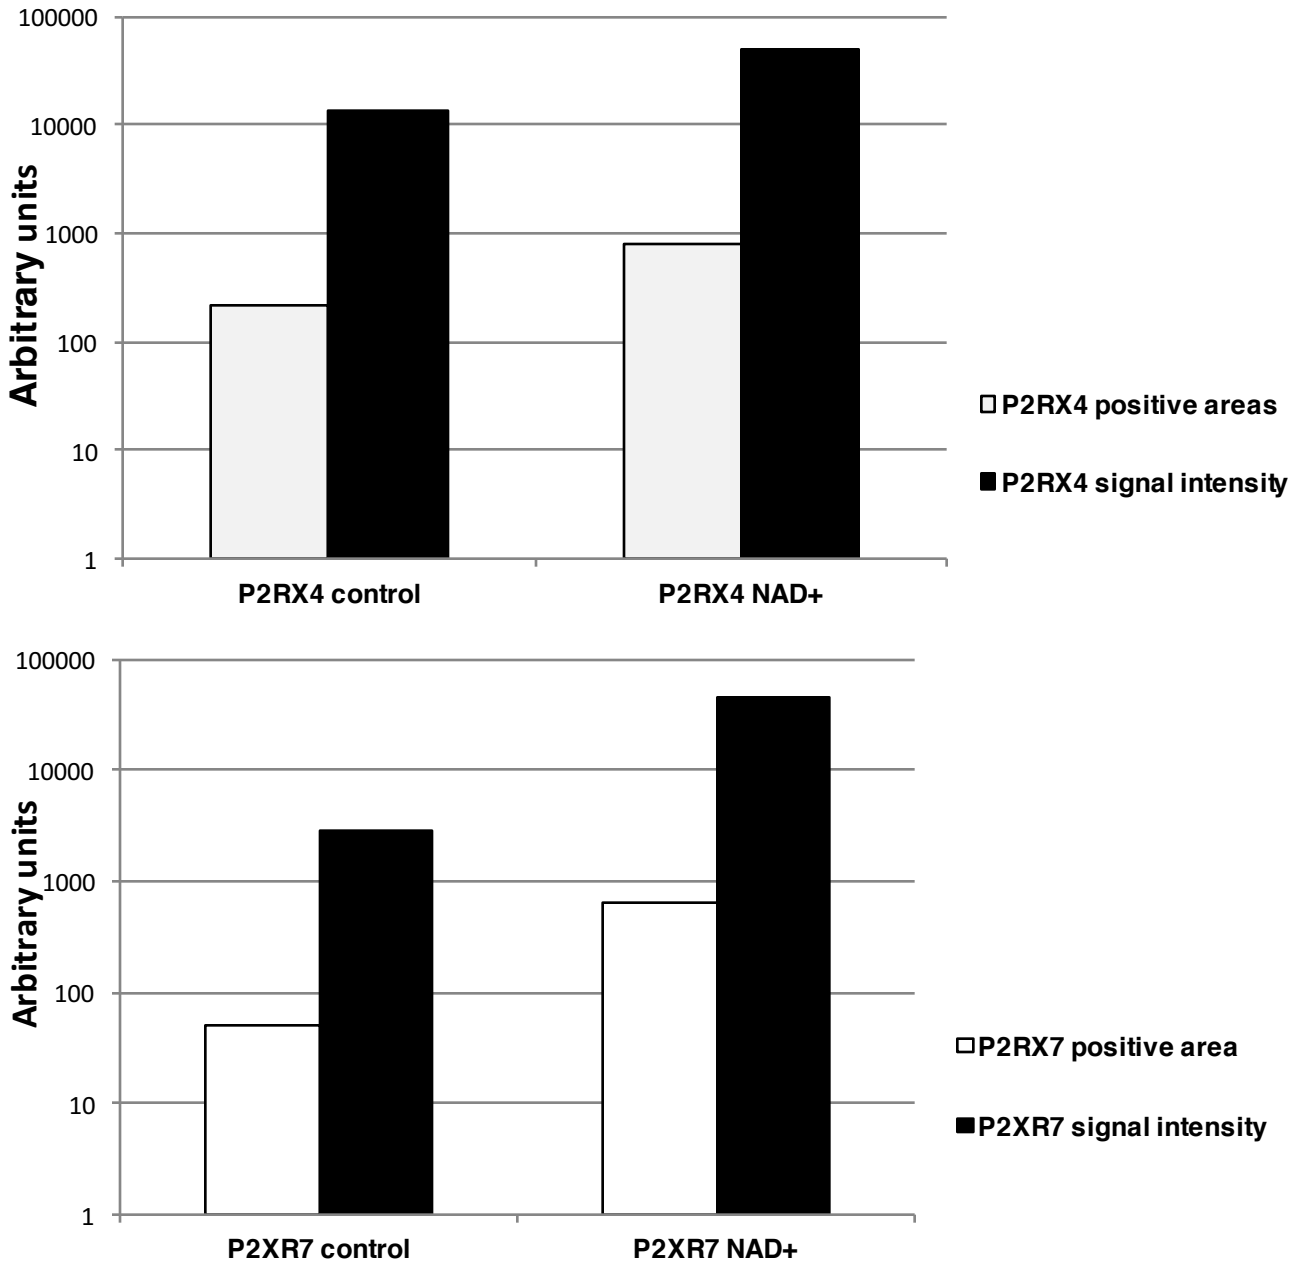

**Supplementary Figure S3: NAD<sup>+</sup> increases P2RX4 and P2RX7 cell surface expression.** Isolated T cells were cultured for 24hrs in presence of vehicle alone (right column) or 50 $\mu$ M NAD<sup>+</sup> (left column). Cells were collected and stained at 4°C for either P2RX4 (top row) or P2RX7 (bottom row) without prior fixation or permeabilization. Stacks of 20, 2-channel images were acquired under each condition; resulting stacks were de-convolved and re-constituted for further analysis. Results shown Quantification of positive area as well as signal intensity.

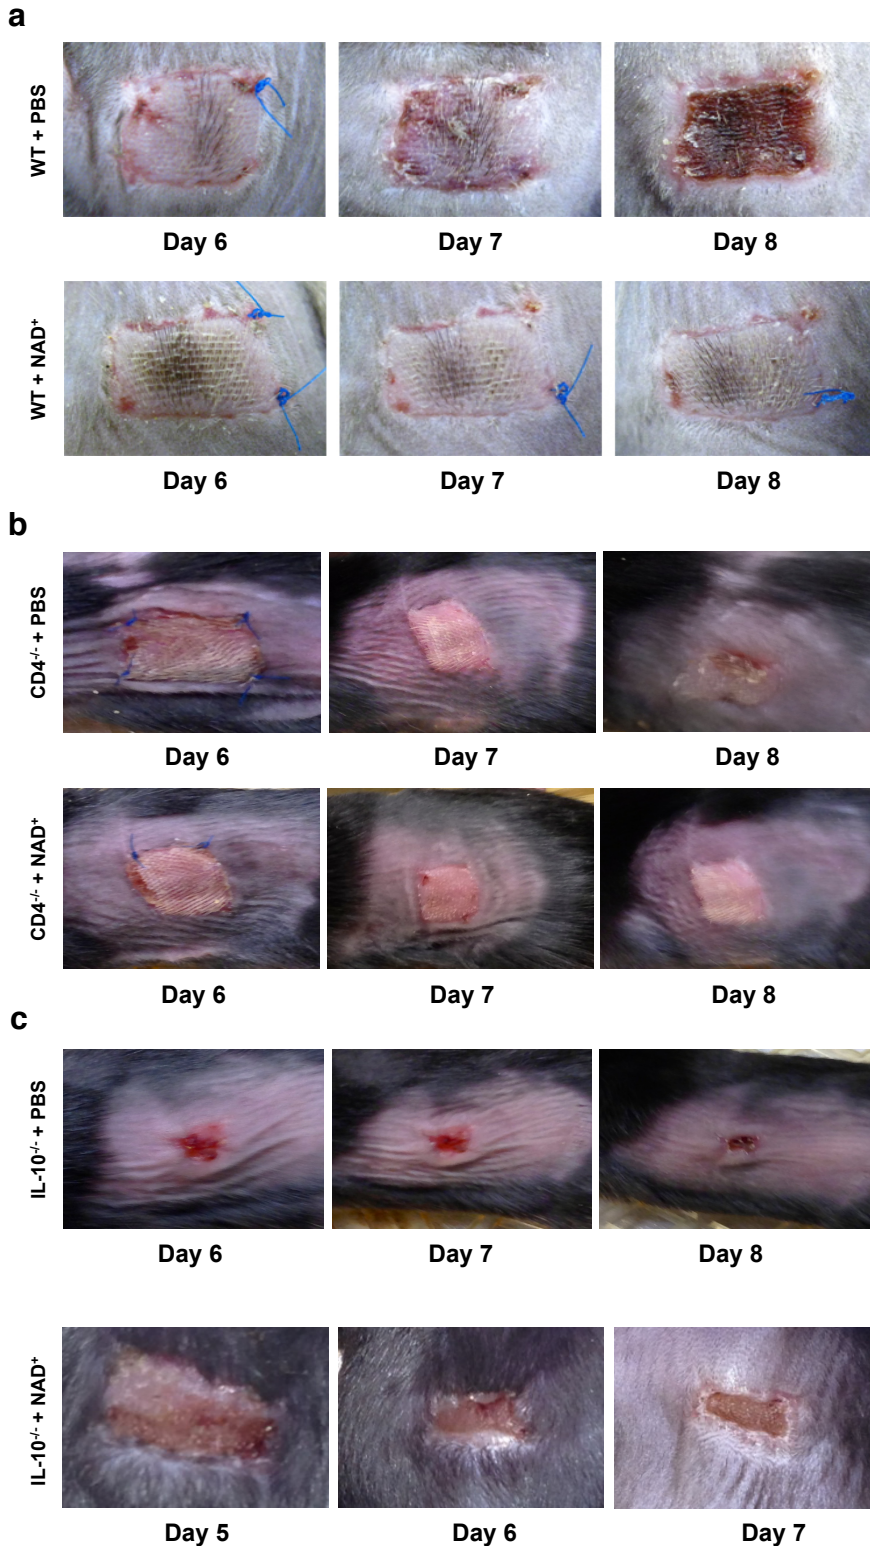

**Supplementary Figure S4: NAD<sup>+</sup> promotes allograft survival.** Photos of skin grafts from day 6 to day 13 after transplantation of mice treated with NAD<sup>+</sup> or with a placebo solution. Fully MHC-mismatched tail skin allografts from C57BL/6 mice were transplanted onto DBA/2 recipient mice that received (A) control solution (PBS) or daily doses of NAD<sup>+</sup> (40 mg). (B) Fully MHC-mismatched DBA tail skin allografts were transplanted onto CD4<sup>-/-</sup> mice (C57BL/6 background) that were treated daily with NAD<sup>+</sup> (40 mg). (C) Fully MHC-mismatched DBA tail skin allografts were transplanted onto IL-10<sup>-/-</sup> mice (C57BL/6 background) that were treated daily with NAD<sup>+</sup> (40 mg). Photos of skin grafts were taken daily from day 6 to day 13. For IL-10<sup>-/-</sup> mice photos of skin grafts were taken daily from day 5 to day 7. *n*=5 mice per group; representative images are shown.

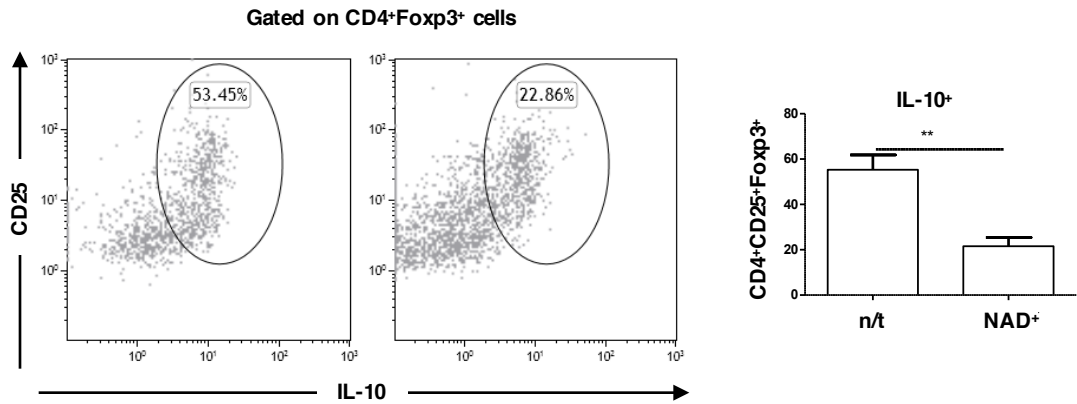

**Supplementary Figure S5: Increased systemic production of IL-10 is not mediated through Tregs.** Fully MHC-mismatched C57BL/6 tail skin allografts were transplanted onto DBA/2 mice that received daily doses of NAD<sup>+</sup> (40 mg in 100μl PBS) or control solution (PBS). CD4<sup>+</sup> T cells were isolated from spleens 8 days after transplantation and gated on CD4<sup>+</sup>Foxp3<sup>+</sup> cells and frequencies of IL-10<sup>+</sup>CD25<sup>+</sup> were analyzed by flow cytometry (*n*=6 per group, representative plots shown).

**Supplementary Movie S1: NAD<sup>+</sup> promotes cell surface expression of P2RX4 and P2RX7 receptors on Tregs.** P2RX4 expression by Tregs in presence of (a) PBS solution or (b) 50  $\mu$ M of NAD<sup>+</sup> after 24hrs of culture. P2XR7 expression by Tregs in presence of (c) PBS solution or (d) 50  $\mu$ M of NAD<sup>+</sup> after 24hrs of culture.
